# Supplementary material for: Ramon Flour (Brosimum alicastrum Swartz) Ameliorates Hepatic Lipid Accumulation, Induction of AMPK Phosphorylation, and Expression of the Hepatic Antioxidant System in a High-Fat-Diet-Induced Obesity Mouse Model
Source: MDPI journal article supplement (doi:10.3390/antiox12111957), 2023-11-02
Supplement: s1 [file s1]

**Table S1.** Description of composition of experimental diets (g/100g diet).

| <b>Nutrient</b>     | <b>Source</b>      | <b>AIN-93</b> | <b>AIN-93 adjusted<br/>25% Ramon flour</b> | <b>HFD</b>  | <b>HFD adjusted<br/>25% Ramon flour</b> |
|---------------------|--------------------|---------------|--------------------------------------------|-------------|-----------------------------------------|
| <b>Carbohydrate</b> |                    | <b>62.9</b>   | <b>62.9</b>                                | <b>41.6</b> | <b>41.6</b>                             |
|                     | Cornstarch         | 39.7          | 28.8                                       | 26.3        | 41.5                                    |
|                     | Maltodextrin       | 13.3          | 9.39                                       | 8.73        | 14.8                                    |
|                     | Sucrose            | 10            | 7.11                                       | 6.61        | 3.72                                    |
|                     | Ramon flour        | -             | 18.2                                       | -           | 18.2                                    |
| <b>Protein</b>      |                    | <b>20</b>     | <b>20</b>                                  | <b>24</b>   | <b>24</b>                               |
|                     | Casein             | 20            | 17.1                                       | 24          | 21.1                                    |
|                     | Ramon flour        | -             | 2.9                                        | -           | 2.9                                     |
| <b>Lipid</b>        |                    | <b>7</b>      | <b>24</b>                                  | <b>7</b>    | <b>24</b>                               |
|                     | Soy oil            | 7             | 6.7                                        | 7           | 6.7                                     |
|                     | Lard               | -             | -                                          | 17          | 17                                      |
|                     | Ramon flour        | -             | 0.3                                        | -           | 0.3                                     |
| <b>Fiber</b>        |                    | <b>5</b>      | <b>5.3</b>                                 | <b>5</b>    | <b>5.3</b>                              |
|                     | Cellulose          | 5             | -                                          | 5           | -                                       |
|                     | Ramon flour        | -             | 5.3                                        | -           | 5.3                                     |
| <b>Mineral</b>      | Mineral mix        | 3.5           | 3.5                                        | 3.5         | 3.5                                     |
| <b>Vitamin</b>      | Vitamin mix        | 1             | 1                                          | 1           | 1                                       |
|                     | L-Cystine          | 0.3           | 0.3                                        | 0.3         | 0.3                                     |
|                     | Choline bitartrate | 0.25          | 0.25                                       | 0.25        | 0.25                                    |
|                     | TBHQ               | 0.0014        | 0.0014                                     | 0.0014      | 0.0014                                  |

**Table S2.** Sequencies used for mRNA expression by SYBER GREEN assays.

| <b>Gen</b>         | <b>Forward</b>          | <b>Reverse</b>            |
|--------------------|-------------------------|---------------------------|
| <i>Acox1</i>       | GCCATTCGATACAGTGCTGTGAG | CCGAGAAAGTGGAAGGCATAGG    |
| <i>Cpt1</i>        | GCACTGCAGCTCGCACATTACAA | CTCAGACAGTACCTCCTTCAGGAAA |
| <i>Fas</i>         | ATGCACACTCTGCGATGAAG    | CAGTGTTACAGCCAGGAGA       |
| <i>Sod2</i>        | TAACGCGCAGATCATGCAGCTG  | AGGCTGAAGAGCGACCTGAGTT    |
| <i>Cyclophilin</i> | CAGGGGAGATGGCACAGGAG    | CGGCTGTCTGTCTTGGTGCTCTCC  |
